# Supplementary material for: Sporulation Strategies and Potential Role of the Exosporium in Survival and Persistence of Clostridium botulinum
Source: Int J Mol Sci. 2022 Jan 11;23(2):754. doi: 10.3390/ijms23020754 (PMC8775613; doi:10.3390/ijms23020754)
Supplement: Supplementary file 1 [file ijms-23-00754-s001.zip › Table S2.xlsx]

## Sheet: Sheet1
Table S2. Spore structure measurments. Values presented are in nanometers
Strain	Measurment		Spore number										Average	Standart deviation
			1	2	3	4	5	6	7	8	9	10
ATCC 3502	Length spore (with exosporium)		2013.71	1910.93	1714.96	1874.94	1331.68	1772.15	1665.92	1477.49	2082.96	1311.24	1715.6	270.931
	Width spore (with exosporium)		765.843	709.402	669.756	797.968	809.631	693.882	718.37	639.577	729.204	692.839	722.647	54.5244
	Length spore (without exosporium)		883.371	942.87	951.854	1102.03	827.183	971.885	807.969	788.158	908.002	853.421	903.674	93.7885
	Width spore (without exosporium)		573.933	475.933	475.814	501.806	525.428	485.83	498.199	478.163	529.385	512.939	505.743	31.0233
	Length spore core		576.404	627.98	613.698	706.095	535.104	682.186	597.479	563.71	597.875	565.225	606.576	53.5975
	Width spore core		266.517	342.105	239.15	186.456	280.378	263.608	301.666	271.499	249.096	261.787	266.226	40.357
	Cortex thickness	1	130.337	95.1417	77.3056	120.993	93.6094	95.1417	93.2013	117.064	99.6835	74.9734	98.046	19.07
		2	105.618	114.485	111.212	140.181	90.459	77.3729	95.2274	83.2958	100.588	94.6473
		3	98.427	68.8259	89.2857	141.761	104.86	79.3972	83.2958	87.348	109.403	68.2382
	Coat thickness	1	34.8315	40.4858	49.5027	22.3476	25.4275	49.4827	37.5957	49.7524	23.9602	43.2471	34.0593	10.1711
		2	22.2472	28.1152	52.6673	34.9887	23.8524	33.7382	25.8892	26.5646	53.5714	37.9298
		3	26.5169	29.9145	33.4539	25.5079	25.4275	27.6653	27.6902	22.2873	38.2007	48.9188
	Space between the coat and exosporium	1	116.18	52.8565	111.664	73.3634	76.2826	77.3729	61.4588	58.3071	60.5787	44.3105	61.4374	23.1383
		2	81.3483	40.4858	27.1248	55.7562	68.1818	47.6833	35.7947	39.1715	71.8807	60.4396
		3	65.618	44.0846	100.588	52.5959	63.4563	29.6896	43.674	31.7425	97.1971	54.2361
	Space from the top of the coat to the tip of exosporium		725.393	634.053	258.59	304.063	146.04	206.253	377.082	219.271	374.774	398.44	364.396	186.502
	Space from the bottom of the coat to the bottom of exosporium		403.371	361.673	475.814	422.122	268.227	622.807	444.62	345.115	653.933	34.9167	403.26	175.559
	Exosporium thickness	1	24.2697	24.2915	45.8861	22.3476	38.0288	27.4404	22.2873	29.9415	24.4123	34.2077	31.6154	11.5629
		2	21.1236	26.5407	50.6329	32.9571	25.4275	56.0054	24.3134	26.5646	38.4268	20.9146
		3	23.1461	21.1426	60.3526	44.6953	34.8785	52.8565	22.2873	22.2873	27.5769	23.2187
ATCC 19397	Length spore (with exosporium)		1872.41	1715.67	1667.95	1680.12	1658.83	1455.69	1570.2	1629.08	1248.76	1760.72	1625.94	172.277
	Width spore (with exosporium)		766.877	575.191	735.666	678.314	817.216	860.999	704.515	660.779	813.995	765.463	737.901	85.5869
	Length spore (without exosporium)		1005.18	950.023	839.278	942.516	906.688	871.795	865.914	908.514	790.745	994.808	907.546	67.8965
	Width spore (without exosporium)		536.904	408.149	473.589	465.284	568.911	586.37	462.528	521.513	497.517	488.488	500.925	53.6518
	Length spore core		845.41	690.68	598.42	646.078	551.74	571.3	559.819	625.906	486.23	672.912	624.849	98.9374
	Width spore core		298.83	224.223	298.646	243.237	321.735	301.619	239.503	242.98	235.892	243.567	265.023	35.6127
	Cortex thickness	1	82.5833	63.71	85.553	71.4608	67.1035	107.063	95.0339	83.3333	105.192	92.7765	83.9038	13.3912
		2	82.8083	68.8879	78.781	84.5356	102.576	103.914	90.5192	81.5217	74.0406	59.5937
		3	96.0846	77.2175	84.6501	90.6222	84.2747	102.114	66.5914	82.8804	90.2935	61.3995
	Coat thickness	1	40.5041	27.24	36.3431	28.404	34.5685	52.8565	91.4221	35.5525	23.0248	23.2506	37.2385	19.2846
		2	27.2277	22.7375	33.4086	27.7277	35.6981	44.0846	92.5508	25.5888	36.1174	22.7991
		3	28.3528	20.7114	28.8939	28.404	44.5097	26.7656	84.6501	26.0417	40.1806	27.5395
	Space between the coat and exosporium	1	84.1584	65.2859	118.962	97.1596	67.5554	86.1448	24.8307	44.1576	119.413	81.7156	82.8825	32.2466
		2	128.938	100.405	82.3928	93.7782	107.772	104.813	35.8916	57.2917	129.797	136.795
		3	79.4329	41.4228	61.6253	38.5482	111.613	84.5704	26.6366	62.9529	88.2619	124.153
	Space from the top of the coat to the tip of exosporium		346.085	330.482	281.716	176.961	286.941	165.992	289.391	342.391	202.483	429.12	285.156	83.3614
	Space from the bottom of the coat to the bottom of exosporium		533.303	454.525	408.352	401.939	378.671	356.95	408.804	331.069	181.038	316.027	377.068	92.9099
	Exosporium thickness	1	30.378	36.4701	25.2822	34.716	50.836	44.3095	36.5688	38.9493	40.6321	65.0113	37.425	12.4604
		2	27.0027	23.8631	15.8014	34.0397	64.3922	55.3306	30.0226	33.7409	32.5056	53.7246
		3	48.3798	21.6119	28.2167	44.4094	46.995	28.1152	34.9887	21.7391	46.9526	27.7652
UN1/10-7B	Length spore (with exosporium)		1531.98	1580.26	2120.74	2062.97	2319.57	1463.99	2569.08	1997.29	2008.41	2829.49	2048.38	446.191
	Width spore (with exosporium)		941.592	1134.12	1085.11	1172.18	926.976	1174.71	1237.85	1090.19	1079.77	1196.03	1103.85	103.166
	Length spore (without exosporium)		1020.57	1009.74	881.206	1025.73	1166.61	885.598	1058.06	975.362	1155.68	1176.6	1035.52	106.941
	Width spore (without exosporium)		561.562	672.395	693.44	672.004	571.783	680.738	746.4	624.322	715.455	554.652	649.275	67.5601
	Length spore core		615.916	562.899	522.872	582.764	707.551	538.134	667.192	561.257	679.545	769.648	620.778	81.7017
	Width spore core		178.679	330.971	238.121	238.755	265.509	250.089	368.137	225.362	302.273	223.803	262.17	56.4232
	Cortex thickness	1	170.571	135.188	154.078	174.523	156.328	170.096	152.565	106.013	128.182	159.44	139.834	24.5879
		2	155.105	147.059	140.957	166.967	142.503	141.362	136.364	143.987	77.0455	96.206
		3	136.937	132.176	125.887	160.13	151.01	105.534	143.339	171.338	114.545	99.5935
	Coat thickness	1	32.4324	44.2948	22.1631	89.4207	80.4679	26.0731	49.505	65.7776	50	56.2331	46.6587	16.4651
		2	33.4835	33.6641	43.7943	52.177	62.7437	47.712	57.1557	23.2821	26.1364	35.2304
		3	35.5856	30.4748	70.0355	59.194	38.1071	54.984	51.3051	44.7559	37.9545	45.6188
	Space between the coat and exosporium	1	82.4324	89.2984	71.4539	113.89	83.3038	79.9929	111.836	84.3128	83.4091	114.95	99.7579	22.1864
		2	98.9489	164.422	109.574	86.1821	58.6671	101.987	103.285	89.7378	101.364	108.401
		3	92.1922	126.86	134.043	105.614	104.218	91.6992	80.333	110.533	70.6818	139.115
	Space from the top of the coat to the tip of exosporium		118.468	67.3281	504.255	347.787	402.162	228.272	82.5833	595.163	252.955	200.768	279.974	179.232
	Space from the bottom of the coat to the bottom of exosporium		174.024	274.451	573.582	442.605	479.44	314.651	80.333	147.604	478.864	1112.47	407.802	296.55
	Exosporium thickness	1	84.3844	108.965	88.6525	187.298	70.3651	71.1245	73.1323	92.4503	58.4091	98.916	129.868	155.603
		2	54.0541	57.5833	86.1702	87.9813	85.6079	78.3966	529.028	125	87.0455	81.3008
		3	100	63.253	123.05	133.141	103.332	68.2866	822.682	87.0253	95.6818	93.7218
ATCC 17841	Length spore (with exosporium)		1086.89	1010.87	1184.2	1110.36	1106.66	1395.06	1495.71	2125.56	1881.42	2271.93	1466.87	465.342
	Width spore (with exosporium)		777.661	744.639	796.613	862.314	678.774	632.701	814.815	803.587	675.829	1107.82	789.475	133.1
	Length spore (without exosporium)		896.272	756.72	885.492	842.796	879.518	1036	1084.69	1124.22	922.535	958.861	938.709	113.681
	Width spore (without exosporium)		550.962	576.714	533.723	599.184	550.142	436.963	587.398	559.193	526.806	700.045	562.113	66.0332
	Length spore core		432.802	429.629	528.327	473.563	542.523	675.501	734.417	783.857	643.571	568.038	581.223	123.996
	Width spore core		218.431	221.534	208.933	236.515	259.568	170.666	187.444	261.883	300.091	278.933	234.4	40.8626
	Cortex thickness	1	101.473	129.417	115.108	177.786	113.218	107.808	141.373	134.305	100.409	150.09	126.786	23.9089
		2	174.534	102.235	127.398	146.735	125.089	98.4957	166.667	110.538	141.299	167.043
		3	110.192	98.0066	122.152	148.687	131.999	107.092	120.596	115.247	92.458	126.13
	Coat thickness	1	28.8635	32.4675	50.06	28.0341	52.6223	52.6504	24.8419	44.1704	66.7878	77.3056	46.0319	13.6366
		2	25.4059	32.0145	53.807	35.4862	45.3579	59.8138	63.234	61.2108	50.2045	42.9476
		3	61.4853	31.4105	45.2638	33.7119	48.5471	43.159	41.5537	33.6323	61.5629	53.3454
	Space between the coat and exosporium	1	42.0926	51.042	97.7218	75.2307	88.5897	113.718	144.535	82.287	28.8505	134.72	75.3546	35.9594
		2	27.5105	42.5853	41.0671	99.8935	58.4692	53.5458	108.401	56.9507	73.8301	117.541
		3	64.1912	70.3715	165.018	30.3407	53.5082	95.4513	34.5528	82.287	41.7992	84.5389
	Space from the top of the coat to the tip of exosporium		50.8118	102.386	65.7974	146.913	24.9823	162.966	85.8175	136.099	51.3403	571.655	139.877	158.401
	Space from the bottom of the coat to the bottom of exosporium		16.9874	89.55	91.7266	85.3442	147.059	41.7264	222.448	719.058	731.259	593.58	273.874	288.85
	Exosporium thickness	1	32.3211	56.1764	59.5024	29.2761	41.2828	113.718	60.7498	30.0448	51.3403	67.8119	53.0086	24.0332
		2	52.6158	40.4712	44.3645	49.3258	52.7994	84.1691	54.4264	39.9103	119.037	57.6401
		3	34.4257	34.1287	37.9197	31.4053	28.3487	42.2636	71.1382	100.897	38.3916	34.358
UN5/11-8	Length spore (with exosporium)		1585.08	1356.13	1376.74	1572.17	1618.22	2338.64	1760.78	2193.58	1610.79	2572.84	1798.5	419.914
	Width spore (with exosporium)		1070.31	992.521	1041.86	999.774	1150.09	992.958	1014.96	1175.23	1238.07	1136.11	1081.19	87.9056
	Length spore (without exosporium)		979.352	947.293	896.865	790.045	1049.28	1031.54	977.022	963.914	642.443	1201.23	947.898	150.692
	Width spore (without exosporium)		529.014	595.085	584.254	591.403	672.242	656.767	609.726	718.043	680.785	671.296	630.861	57.6775
	Length spore core		545.39	502.315	520.663	419.683	691.23	677.587	542.216	519.266	341.284	708.951	546.858	118.367
	Width spore core		214.489	248.041	228.358	207.692	315.325	209.737	287.139	275.841	159.385	253.704	239.971	45.5557
	Cortex thickness	1	89.3556	180.912	134.663	134.163	75.2712	152.786	63.0566	165.138	200.401	148.148	136.162	39.6263
		2	125.667	137.108	116.673	120.362	92.6763	138.702	171.892	168.807	135.756	174.074
		3	148.273	94.9074	83.5411	89.3665	101.944	187.998	208.586	187.768	98.5288	158.333
	Coat thickness	1	64.7917	73.1838	46.1347	68.552	45.66	39.804	40.6128	35.1682	54.8373	62.3457	47.8763	14.4295
		2	37.0239	41.6667	42.9284	72.3982	30.0633	33.3742	26.7189	30.8869	59.2956	47.8395
		3	66.9277	67.4858	50.5878	41.629	63.2911	32.7618	30.6377	42.5076	56.6206	30.5556
	Space between the coat and exosporium	1	83.4817	146.724	182.045	144.57	204.114	120.943	50.7659	221.407	191.708	109.877	140.368	51.7478
		2	119.794	60.5413	165.657	79.8643	84.3128	120.637	78.7317	175.841	235.845	148.148
		3	112.852	112.001	220.164	131.448	169.304	117.881	156.751	94.1896	237.182	134.259
	Space from the top of the coat to the tip of exosporium		128.159	162.749	120.235	177.376	89.2857	288.732	351.621	192.661	223.584	564.198	229.86	141.765
	Space from the bottom of the coat to the bottom of exosporium		277.679	188.746	293.374	420.814	353.526	842.009	507.125	906.728	626.17	680.864	509.704	246.5
	Exosporium thickness	1	82.7697	50.9259	65.3723	45.7014	42.7215	50.8267	34.2002	49.8471	58.4039	67.9012	58.9375	19.1325
		2	72.2677	28.6681	55.041	91.4027	27.1248	64.2988	40.4346	80.7339	81.5872	50.9259
		3	84.1937	40.9544	55.5753	41.629	57.4141	52.6638	37.7627	86.8502	75.7914	94.1358
Eklund 17B	Length spore (with exosporium)		1147.72	983.459	1579.53	1982.62	1693.4	1841.94	2451.05	2370.96	2742.76	2537.05	1933.05	595.554
	Width spore (with exosporium)		903.869	849.474	1018.91	932.731	1012.43	934.661	1005.23	967.04	1295.75	1090.02	1001.01	123.774
	Length spore (without exosporium)		846.731	761.353	1104.45	1076.75	869.86	1256.07	1176.42	1075.87	1076.4	1069.5	1031.34	155.448
	Width spore (without exosporium)		664.067	637.744	689.466	677.878	711.93	789.359	661.33	750.311	790.511	649.112	702.171	56.4269
	Length spore core		552.19	398.947	783.139	680.135	573.43	864.966	770.936	632.152	593.962	642.988	649.284	133.928
	Width spore core		394.871	249.774	426.122	370.655	440.127	495.955	252.155	325.56	459.643	332.823	374.768	84.3658
	Cortex thickness	1	105.879	104.06	90.3146	53.0474	105.965	148.413	137.007	143.035	129.39	131.353	118.191	28.0638
		2	108.728	126.015	93.4959	111.738	73.4297	147.791	141.318	89.8632	135.551	116.044
		3	105.729	95.9398	102.156	175.621	80.2079	125.078	130.234	140.236	177.141	120.943
	Coat thickness	1	42.2915	71.2782	45.0689	46.2754	38.8613	39.5146	79.7414	87.6866	90.573	43.7844	52.7683	15.8443
		2	53.3893	49.6241	60.2686	45.1467	46.3172	38.2701	61.2685	35.4478	44.6704	78.6895
		3	34.6431	59.6992	44.7154	33.86	55.8066	43.8706	42.7956	53.4826	44.3623	71.6473
	Space between the coat and exosporium	1	68.8362	30.3759	72.4638	306.546	208.089	59.4275	79.1256	86.4428	128.158	66.1359	136.985	84.822
		2	56.6887	135.038	248.674	218.51	81.5635	62.5389	70.5049	75.5597	104.128	214.636
		3	77.0846	79.3985	150.053	101.58	195.662	213.441	237.069	127.488	174.368	379.976
	Space from the top of the coat to the tip of exosporium		63.1374	92.9323	208.378	554.853	256.665	165.526	58.1897	453.98	174.368	223.821	225.185	163.328
	Space from the bottom of the coat to the bottom of exosporium		168.416	98.9474	258.749	548.307	504.519	389.857	1099.45	785.759	1330.87	1154.62	633.949	437.661
	Exosporium thickness	1	24.895	59.6992	55.4966	69.7517	60.0994	23.3354	26.17	27.6741	23.7215	73.4844	41.4556	25.0454
		2	22.4955	23.4586	22.4461	18.5102	55.5807	16.8015	26.17	49.4403	101.664	18.3711
		3	25.7948	58.6466	14.8462	27.088	36.376	115.121	41.564	52.5498	25.5699	46.8463
Beluga	Length spore (with exosporium)
	Width spore (with exosporium)
	Length spore (without exosporium)		912.364	1419.64	1482.62	961.051	1005.66	1851.43	950.742	1286.1	1445.82	905.344	1222.08	323.522
	Width spore (without exosporium)		622.962	609.029	499.549	579.031	507.466	683.553	744.489	570.625	589.616	629.982	603.63	74.0102
	Length spore core		608.016	1146.28	1213.54	631.567	663.122	1582.24	598.74	809.492	1169.07	610.054	903.212	348.512
	Width spore core		346.92	290.745	251.919	287.591	258.824	384.825	485.605	256.86	358.014	331.975	325.328	72.9742
	Cortex thickness	1	91.0326	104.063	100.226	87.183	37.3303	91.095	110.886	92.2177	83.9729	107.337	84.463	18.7259
		2	73.3696	117.156	85.3273	53.6685	66.2896	100.409	73.5493	82.5461	83.7472	61.5942
		3	78.8043	96.614	93.4537	105.072	53.1674	91.7765	59.6041	71.7499	89.842	90.8062
	Coat thickness	1	36.2319	43.7923	36.7946	44.1576	133.032	44.0709	118.534	82.5461	47.8555	58.4239	59.4367	28.2958
		2	43.0254	46.9526	32.5056	132.699	47.9638	38.846	46.5587	75.7985	38.149	82.2011
		3	28.3062	36.1174	32.7314	64.538	73.5294	43.1622	82.771	71.0751	60.4966	60.2355
	Space between the coat and exosporium	1
		2
		3
	Space from the top of the coat to the tip of exosporium
	Space from the bottom of the coat to the bottom of exosporium
	Exosporium thickness	1
		2
		3
	Appendage length	1	47.0249	145.748	237.962		276.884	642.446	157.842	120.432	102.272	283.459	233.372	125.45
		2	108.402	165.052	291.353		82.005	636.619		208.201	286.405	438.034
		3	147.566	202.225	54.826		188.532	398.849		235.899	236.278	255.544
		4	268.374	253.893	121.995		256.113	237.914			184.133
		5	210.169	355.436	365.985		167.977	201.655			123.404
		6	202.452		202.799			142.662
		7	265.2
		8	206.275
		9	318.716
Stockholm C	Length spore (with exosporium)		1416.63	1386.23	1246.28	1222.57	1406.43	1327.77	1215.19	1111.19	1327.17	1289.64	1294.91	97.4375
	Width spore (with exosporium)		896.8	841.986	797.657	855.305	881.242	887.585	915.052	842.806	854.89	900.3	867.362	35.3304
	Length spore (without exosporium)		1331.68	1371.56	1222.4	1214.67	1394.06	1326.86	1117.4	1111.19	1230.73	1165.77	1248.63	102.426
	Width spore (without exosporium)		762.28	814.898	757.774	848.533	768.781	829.571	788.869	841.385	782.334	730.03	792.446	39.5898
	Length spore core		1005.63	793.679	610.861	772.912	870.895	779.684	739.297	747.247	717.44	687.988	772.564	106.757
	Width spore core		438.26	464.56	265.21	370.88	381.916	397.517	497.972	432.327	368.86	275.375	389.288	75.2614
	Cortex thickness	1	85.1735	100.677	133.168	140.858	168.691	132.957	105.904	110.657	88.3281	151.802	112.125	24.3401
		2	128.662	97.7427	115.593	111.512	91.543	103.386	71.8792	107.815	97.3411	79.4294
		3	90.356	93.9052	111.311	108.126	114.71	151.016	84.0469	111.723	116.719	158.709
	Coat thickness	1	128.211	70.4289	153.447	132.506	80.072	104.063	88.5534	145.471	129.788	72.3724	110.232	43.2896
		2	55.881	179.007	67.598	89.6163	103.239	139.278	178.459	60.0355	121.451	65.3153
		3	77.963	141.761	246.507	63.2054	114.71	81.2641	121.902	108.703	70.0766	116.066
	Space between the coat and exosporium	1	101.848	41.7607	26.5886	12.6411	65.9019	30.2483	95.9892	14.3872	42.3614	87.6877	38.1376	25.353
		2	44.164	24.3792	11.041	15.8014	30.5893	42.2122	51.5998	5.68384	43.9387	43.3934
		3	58.5849	16.0271	28.1658	17.6072	19.3432	53.7246	60.3876	11.3677	17.5755	29.1291
	Space from the top of the coat to the tip of exosporium
	Space from the bottom of the coat to the bottom of exosporium
	Exosporium thickness	1	4.05588	4.74041	8.78774	4.06321	7.87224	7.44921	10.365	7.46004	7.21046	11.2613	7.90111	5.04431
		2	7.21046	9.70655	8.11176	10.158	5.84795	8.57788	5.63317	6.92718	7.21046	32.1321
		3	7.88644	4.06321	4.73186	6.32054	5.62303	4.51467	6.30915	5.68384	5.40784	11.7117
BKT015925	Length spore (with exosporium)		1175.9	1351.82	1313.35	1025.08	1066.13	1215.62	964.715	1338.29	1009.92	1093.48	1155.43	144.274
	Width spore (with exosporium)		808.908	773.069	936.129	779.73	841.148	843.243	694.444	824.324	918.696	723.024	814.271	76.754
	Length spore (without exosporium)
	Width spore (without exosporium)
	Length spore core		682.516	900.06	700.932	503.453	686.354	735.736	396.847	641.742	600.691	577.698	642.603	136.462
	Width spore core		471.411	239.104	293.357	285.886	322.813	407.207	200.3	244.895	395.251	272.317	313.254	85.898
	Cortex thickness	1	131.207	135.858	200.631	153.003	126.54	125.225	148.048	121.772	120.98	89.1193	117.045	32.0233
		2	72.5248	83.709	155.245	73.7237	101.743	68.6186	105.706	78.0781	122.332	110.159
		3	140.084	54.8542	152.54	160.661	113.766	112.763	115.165	99.6997	131.8	105.801
	Coat thickness	1	94.6434	121.431	110.911	112.763	124.136	155.105	77.9279	143.544	150.586	118.275	129.514	33.3992
		2	124.887	94.3793	194.019	107.508	143.222	141.892	128.078	133.333	143.072	127.142
		3	111.345	140.818	256.537	135.886	107.304	117.568	101.051	155.105	113.015	99.9399
	Space between the coat and exosporium	1
		2
		3
	Space from the top of the coat to the tip of exosporium
	Space from the bottom of the coat to the bottom of exosporium
	Exosporium thickness	1	5.71772	8.41599	10.2194	7.95796	4.95942	5.25526		10.3604			5.48385	4.7047
		2	6.31959	6.76285	8.56628	5.25526	7.51428	3.75375		21.3213
		3	7.07192	8.56628	5.71085	6.90691	6.91313	6.75676		10.2102
